# Supplementary material
Source: HighWire-hosted journal article supplement (https://www.highwirestage.com/highwire/filestream/91786/field_highwire_adjunct_files/0/0022.pdf)
Supplement: 0022.pdf [file 0022.pdf]

## Supplementary material

### Methods

#### *Scanning protocol:*

The MRI scanning protocol consisted of pre- and post-gadolinium 3DT1 scans (TR= 9.8 ms, TE= 4.6 ms, flip angle 8°, voxelsize 1.15 x 1.15 mm, 130 slices of 1.2 mm), a sagittal acquired 3D FLAIR (TR= 4800 ms, TE= 279 ms, flip angle 40°, voxelsize 1.11 x 1.11 mm, 310 slices of 1.12 mm), a DWI (TR= 2685 ms, TE= 72 ms, flip angle 90°, voxelsize 1.96 x 2.44 mm, 25 slices of 5 mm), a SWI (TR= 45 ms, TE= 31 ms, flip angle 13°, voxelsize 0.78 x 0.78 mm, 140 slices of 0.8 mm) and a T2 scan (TR= 4744 ms, TE= 80 ms, flip angle 90°, voxelsize 0.43 x 0.48 mm, 48 slices of 3 mm).

#### *Measurements:*

General features of small-vessel disease were evaluated on baseline scans. Brain atrophy was defined as central (enlargement of the ventricles) or peripheral (enlargement of the gyri) and rated on a subjective scale of 0 to 3 (none/moderate/severe).<sup>1</sup> The volume of WMLs was automatically assessed using a previously described method,<sup>2</sup> using tools of the FSL software package (Functional MRI of the Brain [FMRIB] Software Library v5, [www.fmrib.ox.ac.uk/fsl](http://www.fmrib.ox.ac.uk/fsl)).<sup>3</sup> In short, 3DT1 and FLAIR images were brain extracted using the brain extraction tool and co-registered using FMRIB's linear image registration tool to the MNI152 standard space. WML volumes in a conservative MNI white matter mask were automatically identified using a threshold of three standard deviations above the mean FLAIR signal intensity.<sup>2</sup> Presence of periventricular WMLs and deep WMLs were also separately evaluated using the Fazekas scale.<sup>4</sup> Enlarged perivascular spaces (EPVS) were assessed in the

basal ganglia (BG) and semiovale center (SC) on T2 and T1-weighted images, and rated according to a 4-point semi-quantitative score (none/mild/moderate/frequent).<sup>5</sup> Lacunar infarcts were defined as parenchymal defects <20 mm, hyperintense on T2-weighted images and hypointense with hyperintense rim on FLAIR images, located in the basal ganglia, thalamus, internal or external capsule, or brainstem.

## References methods

1. Farrell C, Chappell F, Armitage PA, et al. Development and initial testing of normal reference MR images for the brain at ages 65-70 and 75-80 years. *Eur Radiol*. 2009;19(1):177-83. doi:<https://doi.org/10.1007/s00330-008-1119-2>.
2. Hulsey KM, Gupta M, King KS, et al. Automated quantification of white matter disease extent at 3 T: comparison with volumetric readings. *J Magn Reson Imaging*. 2012;36(2):305-11. doi:<https://doi.org/10.1002/jmri.23659>.
3. Jenkinson M, Beckmann CF, Behrens TE, et al. Fsl. *Neuroimage*. 2012;62(2):782-90. doi:<https://doi.org/10.1016/j.neuroimage.2011.09.015>.
4. Fazekas F. MR signal abnormalities at 1.5 T in Alzheimer's dementia and normal aging. *AJR Am J Roentgenol*. 1987;351-6. doi:<https://doi.org/10.2214/ajr.149.2.351>.
5. Potter GM, Chappell FM, Morris Z, et al. Cerebral perivascular spaces visible on magnetic resonance imaging: development of a qualitative rating scale and its observer reliability. *Cerebrovasc Dis*. 2015;39(3-4):224-31. doi:<https://doi.org/10.1159/000375153>.

**Supplementary Table 1 Clinical findings during Baseline and Follow-up**

|                                                              | <b>Baseline (n=29)</b> | <b>Follow-up (n=17)</b> |
|--------------------------------------------------------------|------------------------|-------------------------|
| Retinopathy <sup>1</sup> (yes, n(%))                         | 19/20 (95)             | 16/17 (94)              |
| Features of focal or global brain<br>dysfunction (yes, n(%)) | 11/29 (38)             | 11/17 (65)              |
| Internal organ dysfunction <sup>2</sup> (yes, n(%))          | 6/29 (21)              | 8/17 (47)               |

<sup>1</sup> 20 mutation carriers were aware of their mutation status and were tested for vascular retinopathy.

<sup>2</sup> Internal organ dysfunction was defined as organ dysfunction (liver, kidney and thyroid disease and anemia) requiring treatment.

**Supplementary Table 2 Imaging findings in mutation carriers with progression at follow-up**

| MC | Age at Baseline* | Time Follow up (Months) | Nr of Baseline Lesions | Nr of New Lesions | Pseudo Tumor | Maximum Contrast Enhancement (Months) | Maximum Diffusion Restriction (Months) | New Infratentorial Lesions |
|----|------------------|-------------------------|------------------------|-------------------|--------------|---------------------------------------|----------------------------------------|----------------------------|
| 1  | 60               | 31                      | 9                      | 1                 | Yes          | 31                                    | 23                                     | -                          |
| 2  | 60               | 36                      | 5                      | 6                 | -            | 37                                    | 22                                     | -                          |
| 3  | 50               | 28                      | 2                      | 2                 | -            | 16                                    | -                                      | -                          |
| 4  | 55               | 28                      | 1                      | 1                 | -            | 19                                    | -                                      | Yes                        |
| 5  | 60               | 25                      | 6                      | 3                 | -            | 25                                    | 25                                     | Yes                        |
| 6  | 45               | 33                      | 0                      | 4                 | Yes          | 6                                     | 6                                      | Yes                        |
| 7  | 45               | 33                      | 2                      | 3                 | -            | 17                                    | 16                                     | -                          |
| 8  | 55               | 31                      | 7                      | 1                 | -            | 31                                    | 31                                     | -                          |
| 9  | 65               | 26                      | 0                      | 1                 | -            | -                                     | -                                      | -                          |
| 10 | 40               | 27                      | 1                      | 5                 | -            | -                                     | -                                      | Yes                        |
| 11 | 55               | 31                      | 10                     | 1                 | -            | 32                                    | 32                                     | -                          |
| 12 | 60               | 24                      | 0                      | 0                 | -            | -                                     | -                                      | Yes                        |

MC=mutations carrier

\*Age was rounded to the nearest half-decade to protect anonymity

**Supplementary Figure 1 Development of focal calcifications on CT images**

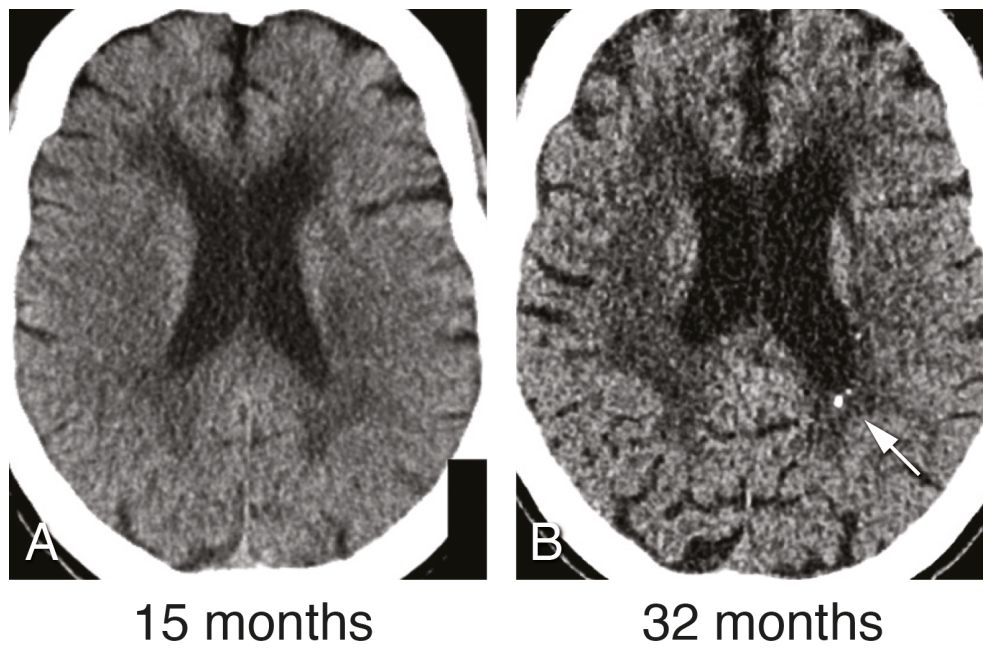

CT images acquired in the mutation carrier from Figure 5 at 15 and 32 months. No calcifications are present at 15 months. At 32 months development of focal calcifications is seen, corresponding with the SWI artefacts seen at 31 months (Figure 5).
